# Supplementary material
Source: PubMed Central journal article supplement (PMC10909581)
Supplement: jmcp.2023.23153_s001.pdf [file jmcp.2023.23153_s001.pdf]

## **SUPPLEMENTARY MATERIAL**

### **Sociodemographic and spending characteristics of Medicare beneficiaries taking prescription drugs subject to price negotiations**

Irina C. Odouard, MPH; Gerard Anderson, PhD; G. Caleb Alexander, MD, MS; Jeromie Ballreich, PhD, MHS

**SUPPLEMENTARY TABLE 1** Medicare Part D Prescription Drugs Facing Price Negotiations in 2026 Under the Inflation Reduction Act

**Supplementary Table 1.** Medicare Part D prescription drugs facing price negotiations in 2026 under the Inflation Reduction Act.

| <b>Drug(brand name)</b>                                                                           | <b>Therapeutic Class</b>                                 | <b>Primary indication(s)</b>                           | <b>Product Type</b> | <b>Approval year</b> |
|---------------------------------------------------------------------------------------------------|----------------------------------------------------------|--------------------------------------------------------|---------------------|----------------------|
| Apixaban (Eliquis)                                                                                | Factor Xa inhibitor                                      | Blood clots                                            | Small molecule      | 2012                 |
| Rivaroxaban (Xarelto)                                                                             | Factor Xa inhibitor                                      | Blood clots, coronary artery disease                   | Small molecule      | 2011                 |
| Sitagliptin phosphate (Januvia)                                                                   | DPP-4 inhibitor                                          | Type 2 diabetes                                        | Small molecule      | 2006                 |
| Insulin aspart (Fiasp; Fiasp FlexTouch; Fiasp PenFill; NovoLog; NovoLog FlexPen; NovoLog PenFill) | Human insulin                                            | Type 2 diabetes                                        | Biologic            | 2000                 |
| Ibrutinib (Imbruvica)                                                                             | Kinase inhibitor                                         | Blood cancer                                           | Small molecule      | 2013                 |
| Empagliflozin (Jardiance)                                                                         | SGLT2 inhibitor                                          | Type 2 diabetes, heart failure                         | Small molecule      | 2014                 |
| Etanercept (Enbrel)                                                                               | TNF blocker                                              | Autoimmune conditions                                  | Biologic            | 1998                 |
| Sacubitril and valsartan (Entresto)                                                               | Nepriylsin inhibitor and angiotensin II receptor blocker | Heart failure                                          | Small molecule      | 2015                 |
| Ustekinumab (Stelara)                                                                             | IL-12 and -23 antagonist                                 | Autoimmune conditions                                  | Biologic            | 2009                 |
| Dapagliflozin (Farxiga)                                                                           | SGLT2 inhibitor                                          | Chronic kidney disease, heart failure, type 2 diabetes | Small molecule      | 2014                 |

Source: Product Prescribing Information.
